# Supplementary material for: Construction of an AuHQ nano-sensitizer for enhanced radiotherapy efficacy through remolding tumor vasculature
Source: Royal Society of Chemistry journal article supplement (doi:10.1039/d1tb00515d), 2021-01-01
Supplement: d1tb00515d1.pdf [file d1tb00515d1.pdf]

## Electronic Supplementary Material

### **Construction of AuHQ nano-sensitizer for enhanced radiotherapy efficacy through remodeling tumor vasculature**

Xiaohui Wang<sup>a</sup>, Xiaoyan Niu<sup>a</sup>, Xiaolei Zhang<sup>a</sup>, Zhenjie Zhang<sup>a</sup>, Xuefeng Gao<sup>a</sup>, Wei Wang<sup>a,\*</sup>, Zhi Yuan<sup>a,\*</sup>

<sup>a</sup>Key Laboratory of Functional Polymer Materials, Institute of Polymer Chemistry, College of Chemistry, Nankai University, Tianjin 300071, China.

\*Corresponding authors. Email: duruo@nankai.edu.cn

Email: zhiy@nankai.edu.cn

Scheme of synthesis process

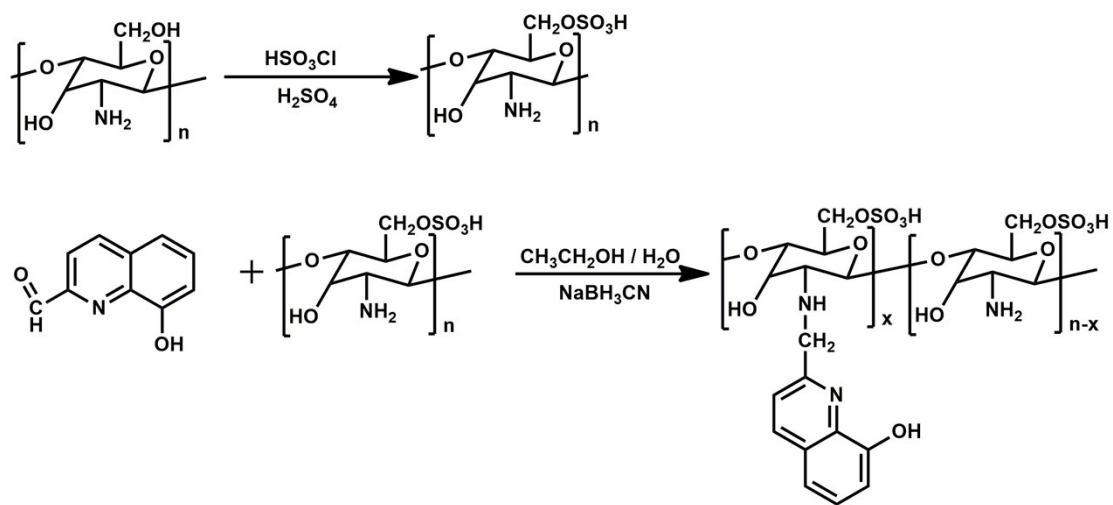

**Scheme S1** Synthesis process of NPs.

Supporting Figures

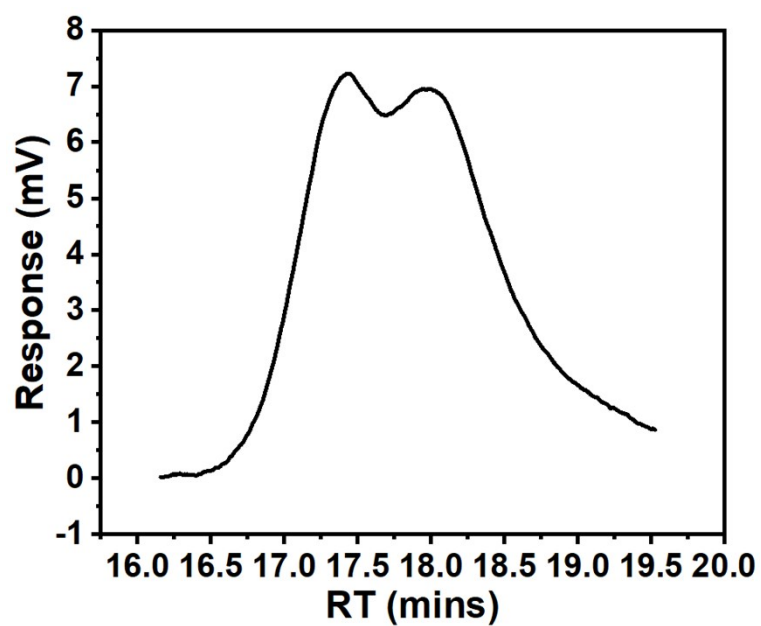

Fig. S1 GPC chromatogram of the SCTS.

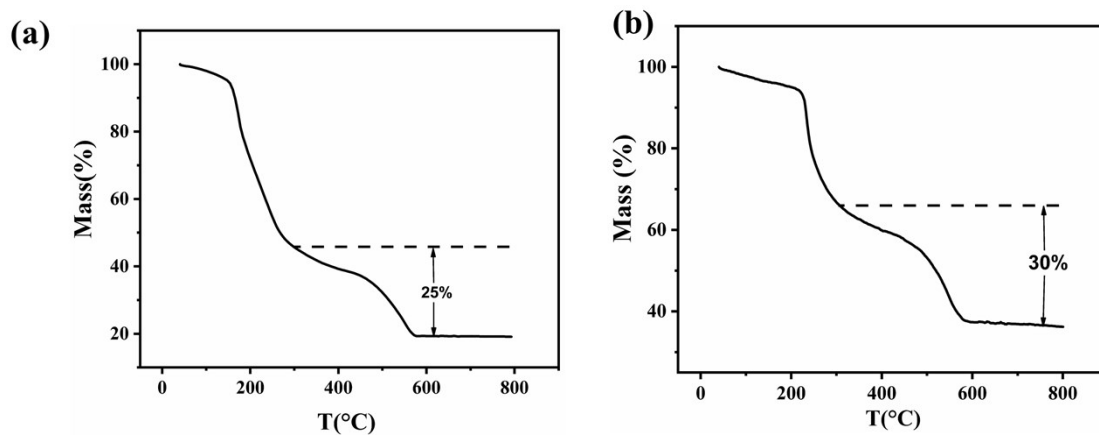

Fig. S2 TGA curve of Au NPs and AuHQ.

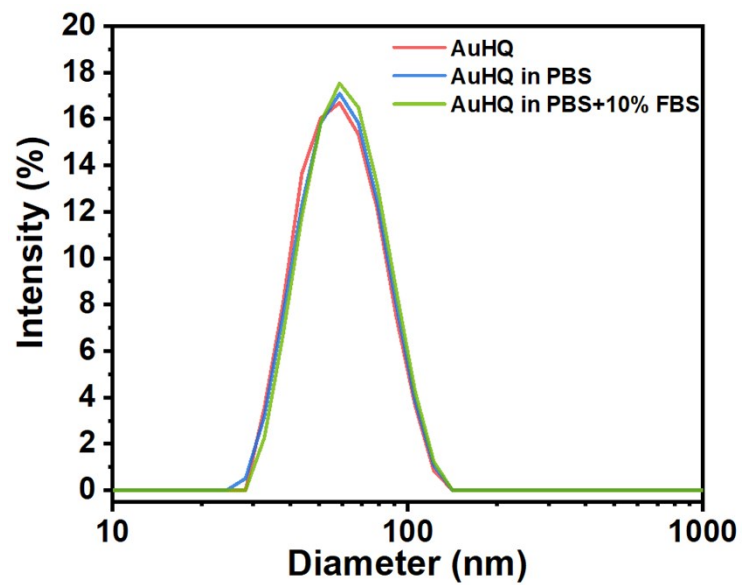

**Fig. S3** Hydrodynamic diameter of AuHQ incubated in water, PBS and PBS with 10% FBS.

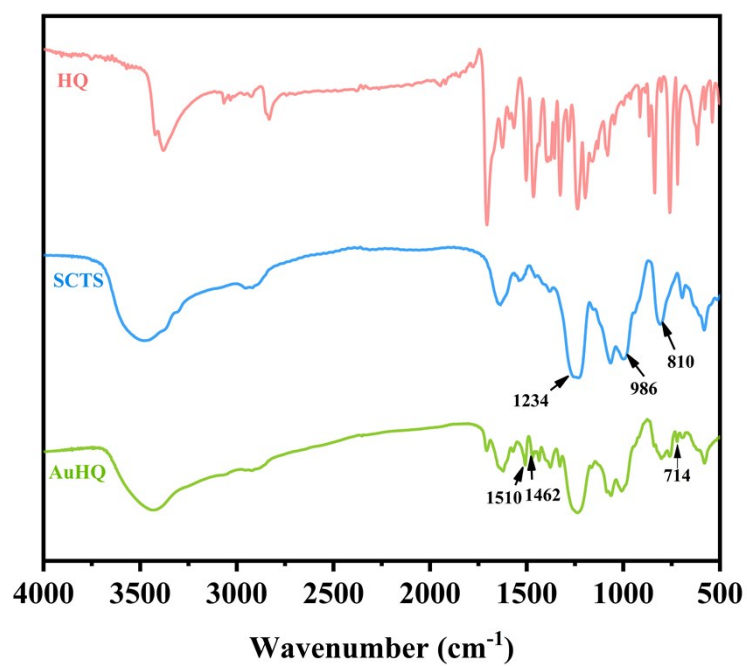

**Fig. S4** FTIR spectra of HQ, SCTS and AuHQ.

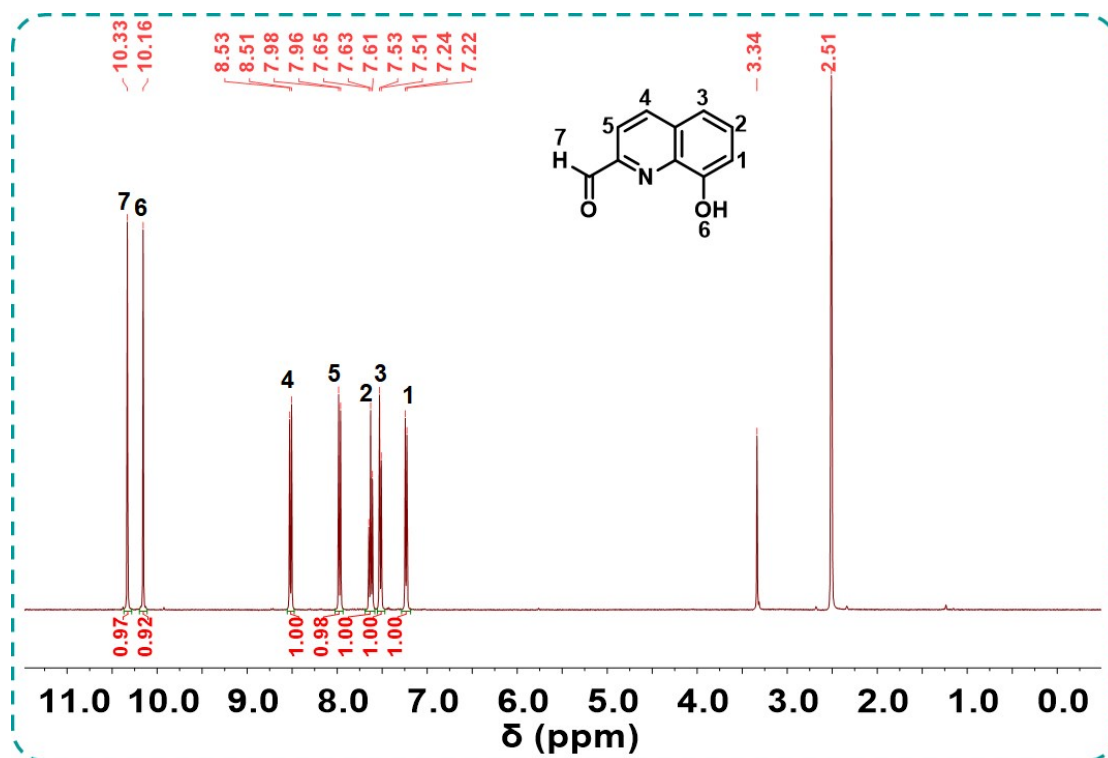

**Fig. S5** <sup>1</sup>H NMR spectrum of 8-hydroxyquinoline-2-formaldehyde in DMSO-d<sub>6</sub> solvent (400 MHz).

<sup>1</sup>H NMR spectrum of 8-hydroxyquinoline-2-formaldehyde (400 MHz, DMSO-d<sub>6</sub>) δ  
 10.33 (s, 1H), 10.16 (s, 1H), 8.55-8.48 (m, 1H), 8.02-7.93 (m, 1H), 7.69-7.58 (m, 1H),  
 7.50-7.54 (d, J = 8.1 Hz, 1H), 7.21-7.25 (d, J = 7.6 Hz, 1H).

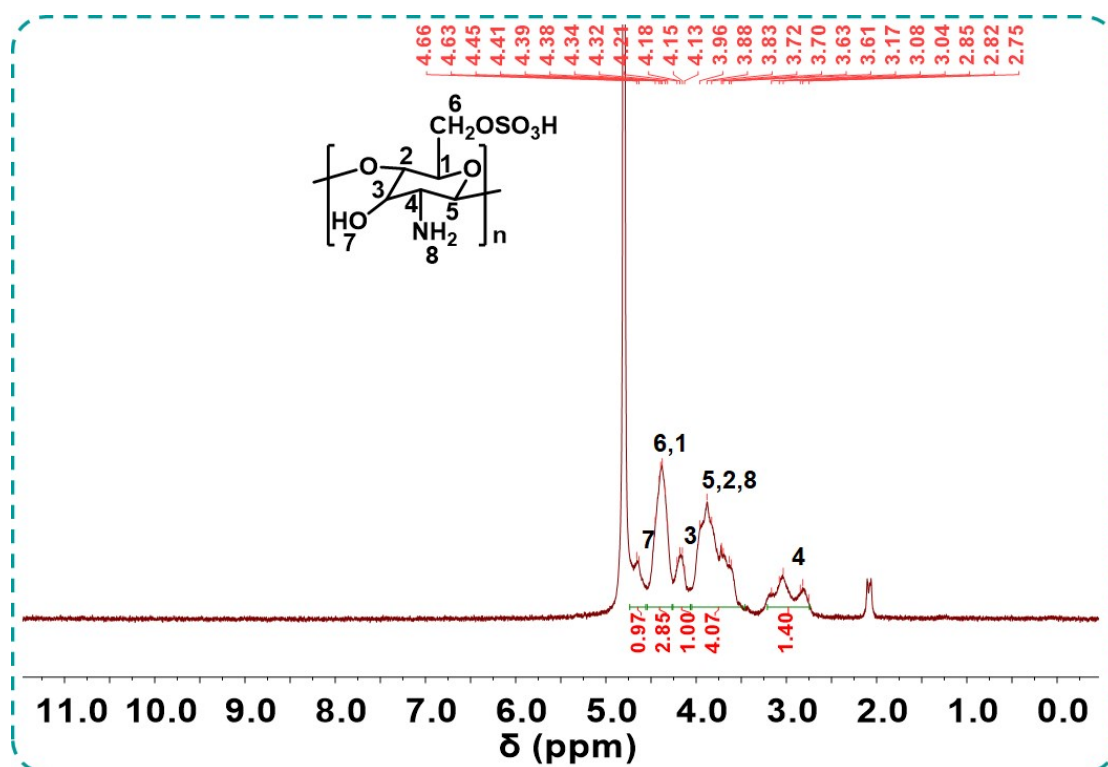

**Fig. S6**  $^1\text{H}$  NMR spectrum of SCTS in  $\text{D}_2\text{O}$  solvent (400 MHz).

$^1\text{H}$  NMR spectrum of SCTS (400 MHz,  $\text{D}_2\text{O}$ )  $\delta$  4.62-4.67 (d,  $J = 10.2$  Hz, 1H), 4.31-4.46 (dq,  $J = 23.8, 13.9, 10.2$  Hz, 3H), 4.26-4.06 (m, 1H), 4.05-3.46 (m, 4H), 3.21-2.75 (m, 1H).

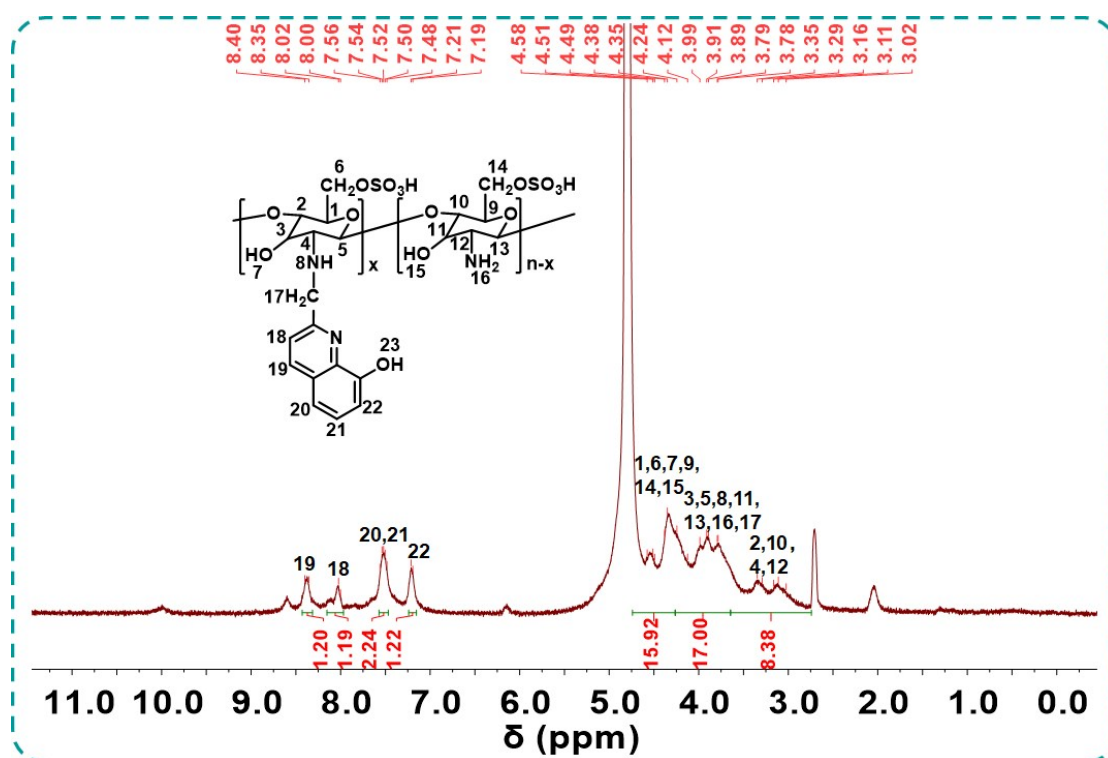

Fig. S7 <sup>1</sup>H NMR spectrum of AuHQ in D<sub>2</sub>O solvent (400 MHz).

<sup>1</sup>H NMR spectrum of AuHQ (400 MHz, D<sub>2</sub>O) δ 8.42-8.33 (s, 1H), 8.03-7.98 (s, 1H), 7.58-7.45 (m, 2H), 7.25-7.18 (s, 1H), 4.74-4.24 (m, 16H), 4.24-3.64 (m, 17H), 3.64-2.74 (m, 8H).

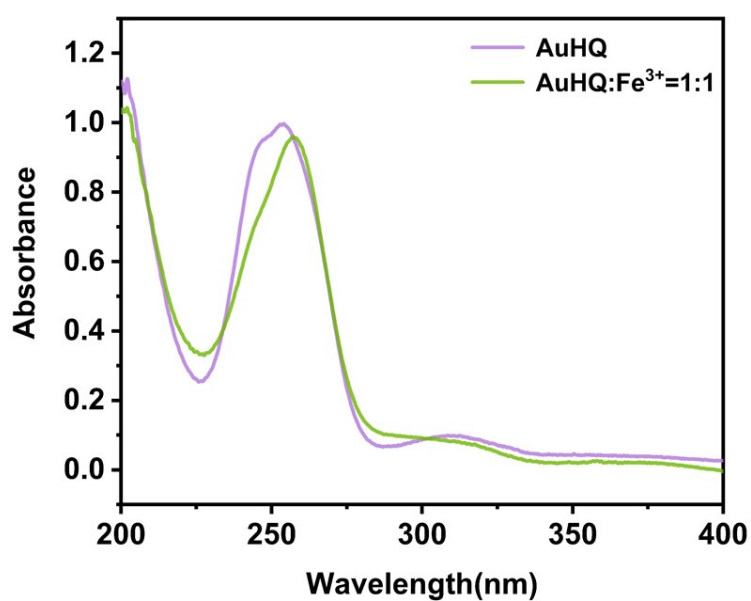

**Fig. S8** UV-vis spectra of AuHQ NPs and Fe<sup>3+</sup>-AuHQ 1:1 solution.



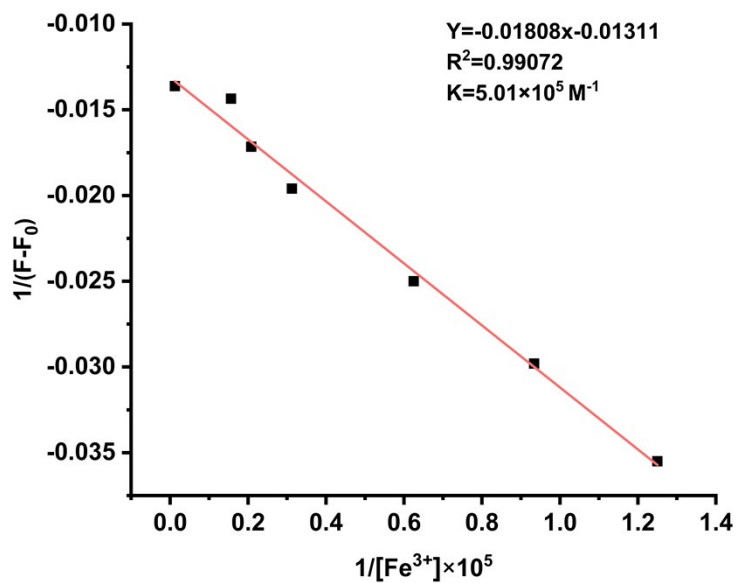

**Fig. S9** Benesi-Hildebrand plot of HQ with  $\text{Fe}^{3+}$  for the determination of stability constant.

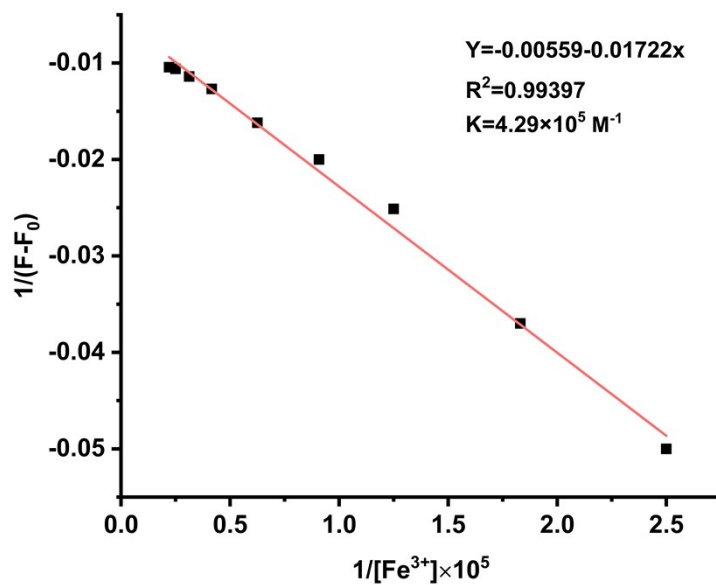

**Fig. S10** Benesi-Hildebrand plot of AuHQ with  $\text{Fe}^{3+}$  for the determination of stability constant.

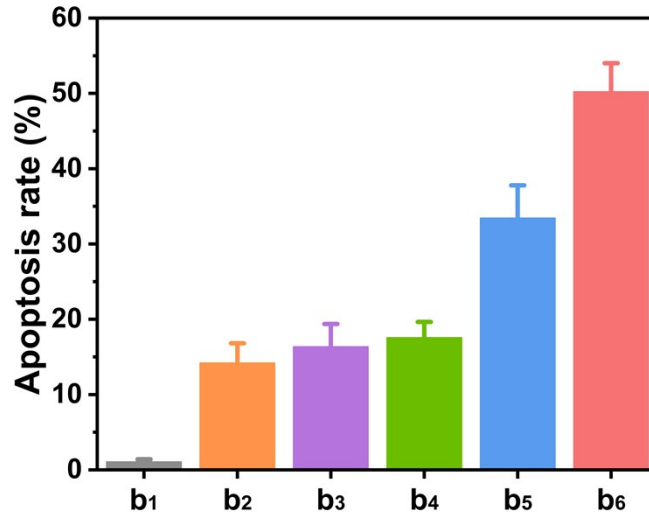

**Fig. S11** Apoptosis rate of HepG2 cells after treatment with AuHQ at concentrations of 0 µg/mL (b1), 12.5 µg/mL (b2), 25 µg/mL (b3), 50 µg/mL (b4), 100 µg/mL (b5) and 200 µg/mL (b6) for 24 h with X-ray irradiation at a dose of 4 Gy.

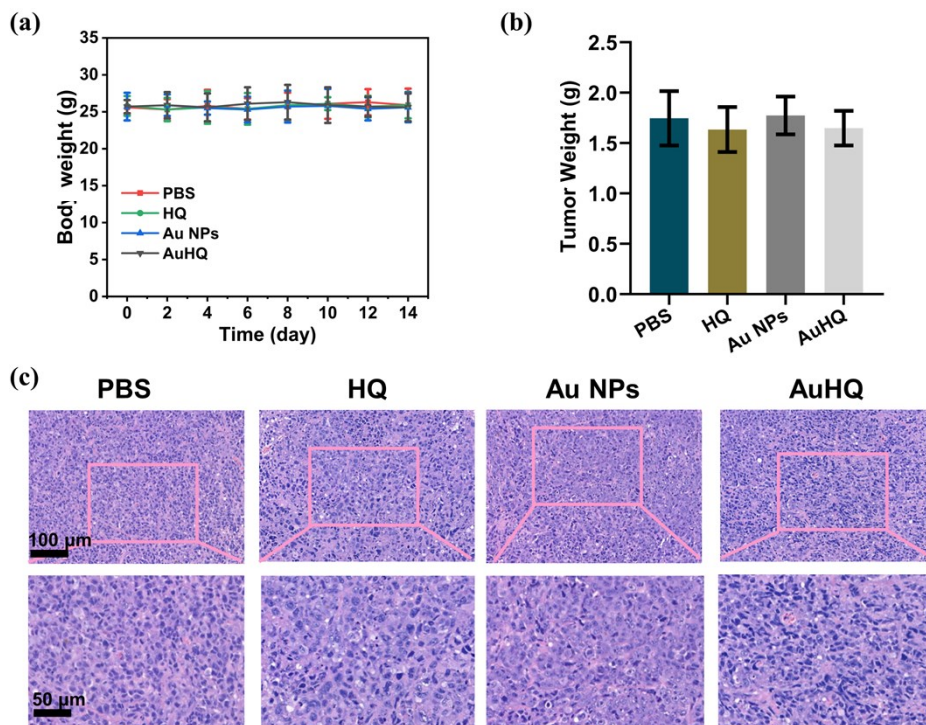

**Fig. S12** *In vivo* antitumor studies without X-ray irradiation. (a) The body weight curve, (b) tumor weight of mice after various treatments; n=5; \*P < 0.05 and \*\*P < 0.01. (c) H&E staining images of tumor sections after different treatments.

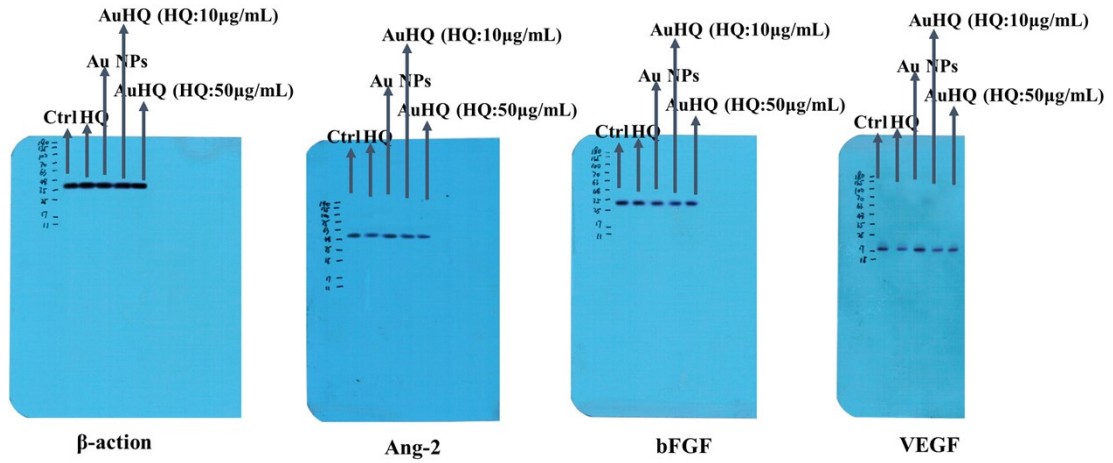

**Fig. S13** Original western blot images of Ang-2, bFGF and VEGF expressions in HUVEC and HepG2 co-culture system after different treatment.

## Supporting Tables

**Table S1** Elemental analysis results of AuHQ and Au NPs.

|       | N    | C     | H     | S      | S/N       | S/C       | Graft ratio |
|-------|------|-------|-------|--------|-----------|-----------|-------------|
|       | (%)  | (%)   | (%)   | (%)    | (mol/mol) | (mol/mol) | (%)         |
| AuNPs | 3.93 | 20.31 | 4.968 | 13.994 | 1.558     | 0.258     |             |
| AuHQ  | 4.29 | 26.67 | 4.712 | 12.423 | 1.267     | 0.175     | 20.35       |
